# Supplementary material for: Divergence of exonic splicing elements after gene duplication and the impact on gene structures
Source: PubMed Central journal article supplement (PMC3091315; doi:10.1186/gb-2009-10-11-r120), 2009-11-02

**A**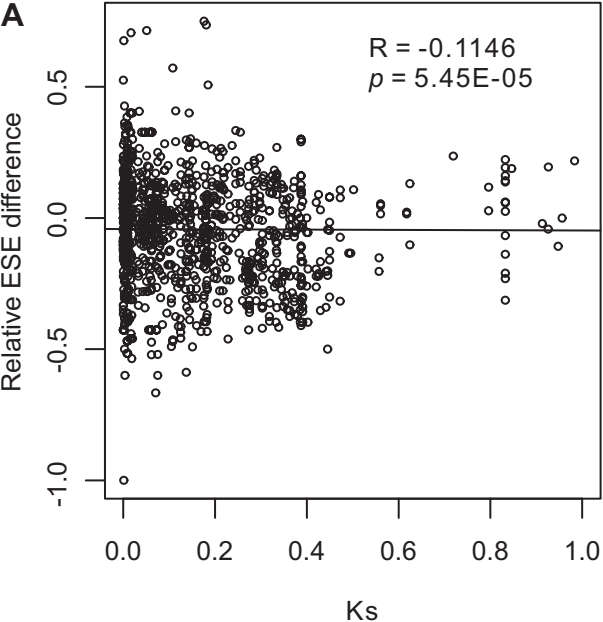**B**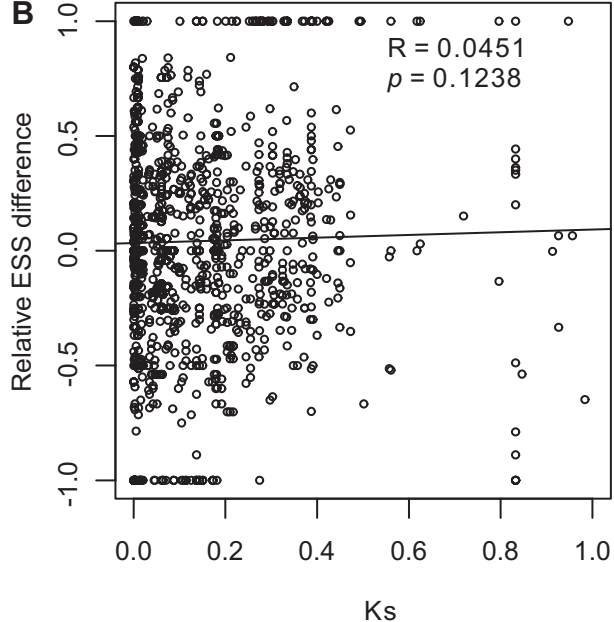

Supplement: gb-2009-10-11-r120-S2.pdf [file gb-2009-10-11-r120-S2.pdf]
